# Supplementary material for: Object-Oriented Modeling Techniques.
Source: MDPI journal article supplement (doi:10.3390/bios12110971), 1991-01-01
Supplement: s1 [file s1]

Supporting Information

# **Accurate and Rapid Genetic Tracing the Authenticity of Floral Originated Honey with the Molecular Lateral Flow Strip**

**Qian Wu<sup>1,†</sup>, Qi Chen<sup>1,†</sup>, Chao Yan<sup>1,2</sup>, Jianguo Xu<sup>1</sup>, Zhaoran Chen<sup>2</sup>, Li Yao<sup>1</sup>, Jianfeng Lu<sup>1</sup>, Bangben Yao<sup>2,\*</sup> and Wei Chen<sup>1,3,\*</sup>**

---

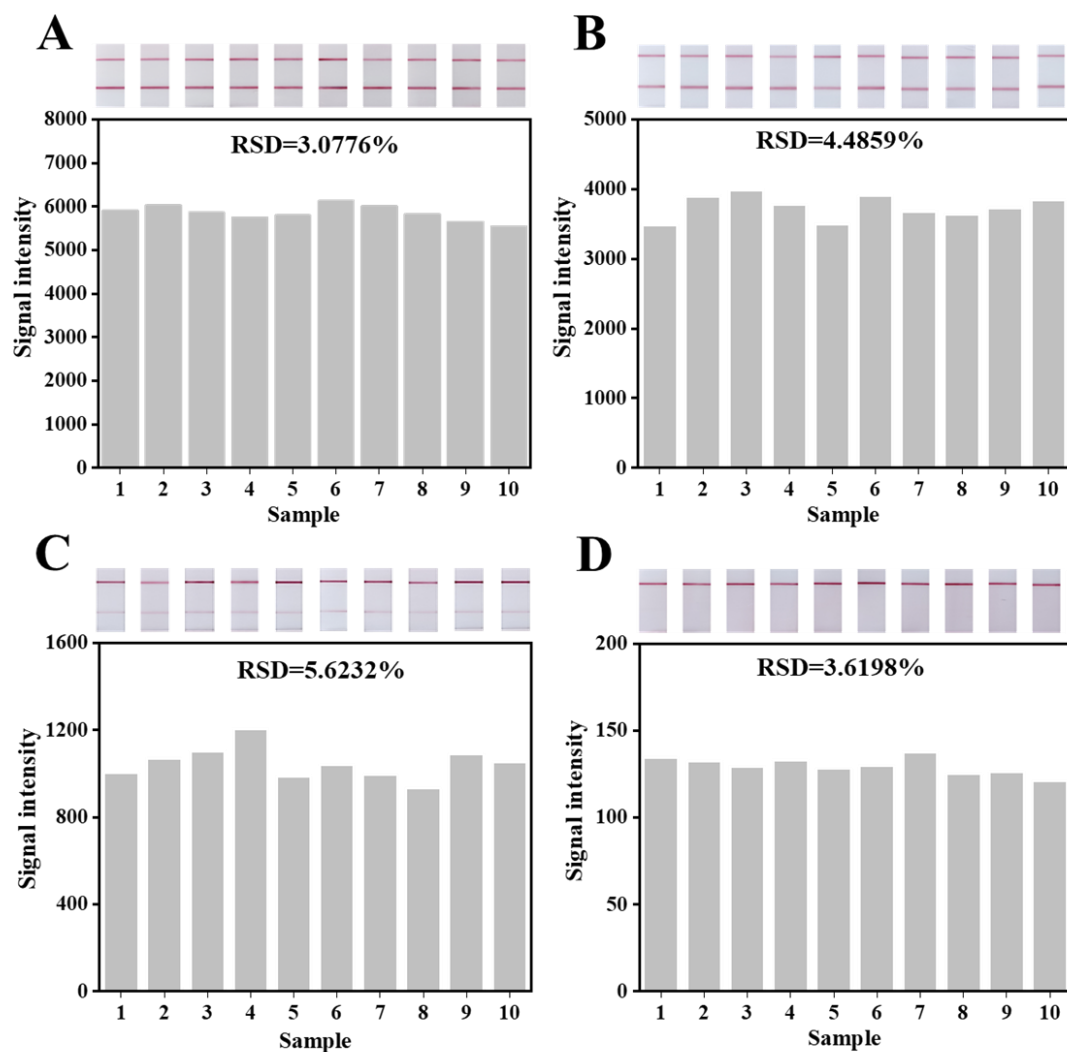

Figure S1. The detection results of the 10 honey samples adulterated at different ratio of (A) 100%; (B) 75%; (C) 25% and (D) 0% (v/v%) with the PLFS.

**Table S1.** The results of real honey sample analysis by the qPCR method (Cq value > 40 means adulteration) and PLFS method.

| Sample           | 1                    | 2                    | 3                    | 4                    | 5                    | 6                    | 7                    |
|------------------|----------------------|----------------------|----------------------|----------------------|----------------------|----------------------|----------------------|
| qPCR Cq value    | 29.08                | 26.79                | 27.93                | 24.97                | 26.39                | 24.57                | 28.55                |
| PLFS Qualitative | Partial adulteration | Partial adulteration | Partial adulteration | Without adulteration | Partial adulteration | Without adulteration | Partial adulteration |
| Sample           | 8                    | 9                    | 10                   | 13                   | 12                   | 13                   | 14                   |
| qPCR Cq value    | 28.86                | 25.45                | 21.90                | >40                  | 25.53                | >40                  | >40                  |
| PLFS Qualitative | Partial adulteration | Partial adulteration | Without adulteration | Adulteration         | Partial adulteration | Adulteration         | Adulteration         |
